# Supplementary material
Source: publisher site journal article supplement (https://www.dovepress.com/article/supplementary_file/591634/591634_Copy%20of%20591634-table%201_r.xlsx)
Supplement: Supplementary file 1 [file 591634_Copy%20of%20591634-table%201_r.xlsx]

## Sheet:  Table 1
Supplemantary Table . Drug development targeting lipid metabolism in breast cancer
category	Drug/Intervention Name	Research institutions or personnel	Research topics	Molecular mechanism	Research phase (clinical trial registration number)
statins	Simvastatin	University of Indonesia	Efficacy of simvastatin combined with neoadjuvant chemotherapy in the treatment of triple-negative breast cancer	Statins can help suppress the epithelial-mesenchymal transition (EMT) process in metastatic tumors.	NCT05550415
	Simvastatin	Michael Simon	The effect of statins on markers of breast cancer cell proliferation and apoptosis in early-stage breast cancer patients	Simvastatin inhibits tumor cell growth by blocking certain enzymes required for cell growth and reduces the invasiveness of breast cancer cells.	NCT03454529
	Letrozole/Simvastatin	Emory University	The efficacy of preoperative letrozole combined with simvastatin versus letrozole alone in the treatment of stage I-III HER2-negative breast cancer	Letrozole and simvastatin may inhibit the growth of cancer cells by blocking certain enzymes required for cell growth.	NCT05464810
	Simvastatin	University of Indonesia	Combination therapy with CAF and simvastatin can improve the efficacy of neoadjuvant chemotherapy in locally advanced breast cancer and increase tumor margins.	Simvastatin and doxorubicin affect MCF-7 cells by downregulating the cell cycle or inducing apoptosis.	NCT04418089
	Atorvastatin	Lund University Hospital	A phase II study of neoadjuvant statin therapy for postmenopausal primary breast cancer	The effect of statins on tumor proliferation	NCT00816244
	rosuvastatin	Duke University	Dosage optimization of rosuvastatin in patients with early and metastatic estrogen receptor-positive breast cancer receiving endocrine therapy	Statins are used to treat estrogen receptor-positive breast cancer.	NCT02483871
	Metformin and Atorvastatin	Tanta University	Antitumor effects of metformin and atorvastatin as adjuvant therapy in chemotherapy for non-metastatic breast cancer patients	Antitumor effects of metformin and statins (hydroxymethylglutaryl-CoA reductase inhibitors) in patients with non-metastatic breast cancer	NCT05507398
	Atorvastatin	Benisov University	Clinical efficacy study of atorvastatin in patients with HER2-negative breast cancer	Statins have lipid-independent effects, including inhibiting inflammatory responses, immunomodulation, inducing apoptosis, and antiproliferative effects, which may help explain their antitumor effects.	NCT05103644
	pitavastatin	Mansula University	The efficacy of statins combined with neoadjuvant chemotherapy in the treatment of breast cancer	Statins have been reported to have advantages in fighting cancer and controlling its progression. Furthermore, they can enhance the sensitivity of cancer cells to radiotherapy.	NCT04705909
	Metformin/Simvastatin/Flavestran	National University Hospital, Singapore	Evaluating the efficacy of metformin and simvastatin combined with fulvestrant in patients with metastatic estrogen receptor-positive breast cancer.	Simvastatin is a lipophilic HMGCoA reductase inhibitor that has been shown to block oncogenic signaling of isoprene-dependent proteins, including the RAS oncogene family, and to attenuate PI3K signaling.	NCT03192293
	Atorvastatin/Capecitabine	MD Anderson Cancer Center	multicenter pilot study of atorvastatin in patients with triple-negative breast cancer (TNBC) who did not achieve pathological complete response (pCR) after neoadjuvant chemotherapy.	Atorvastatin is used to treat high cholesterol and may reduce the risk of recurrence in triple-negative breast cancer.	NCT03872388
	Atorvastatin calcium	The National Cancer Institute (NCI)	A Phase I study of atorvastatin for the prevention of breast cancer in high-risk women.	Chemoprophylaxis refers to the use of certain medications to prevent cancer from developing. Atorvastatin (Lipitor) may help prevent breast cancer.	NCT00637481
	Simvastatin	Johns Hopkins University Sidney Kimmel Comprehensive Cancer Center	Phase II study of simvastatin in high-risk women with breast cancer	For women who have undergone surgery for ductal carcinoma in situ or stage I, II, or III breast cancer and are at high risk of breast cancer recurrence, simvastatin may help prevent cancer recurrence.	NCT00334542
	Metformin	Columbia University	Preoperative "opportunity window" trial: Metformin combined with atorvastatin for the treatment of newly diagnosed operable breast cancer	Metformin is a biguanide drug that activates AMPK, thereby inhibiting mTOR through phosphorylation of TSC2, and exerting its antiproliferative effect by reducing insulin receptor-mediated mitosis and inhibiting cyclin-dependent kinases. Statins have been shown to block oncogenic signaling of isoprenylation-dependent proteins, including the RAS oncogene family, and to attenuate PI3K signaling.	NCT01980823
	Atorvastatin
	zoledronic acid	Mario Negri Institute of Pharmacology	The YAPPETIZER study: a multicenter, randomized, phase II study designed to evaluate the efficacy of neoadjuvant chemotherapy with or without zoledronic acid and atorvastatin in the treatment of triple-negative breast cancer.	Statins are an important class of lipid-lowering drugs that inhibit sterol biosynthesis via the mevalonate pathway by inhibiting HMG-CoA reductase.	NCT03358017
	Atorvastatin
	statins	Peking Union Medical College Hospital	Statins: Survival Benefits for Breast Cancer Patients with Lipid Metabolism	Statins are a class of lipid-lowering drugs. This clinical trial aimed to compare the survival benefits of statins in breast cancer patients with dyslipidemia (low-risk and intermediate-risk ASCVD).	NCT03971019
FASN inhibitors	TVB-2640	Sagimet Biosciences Inc	A Phase I trial of oral TVB-2640 escalation therapy in patients with solid tumors	TVB-2640 belongs to the class of fatty acid synthase inhibitors (FASN inhibitors). This means they interfere with the body's (and tumors') ability to utilize a substance called fatty acid synthase (FASN). Studies have shown that some tumors appear to require FASN to continue growing.	NCT02223247
	Anastrozole\TVB-2640	Mayo Clinic	To evaluate the efficacy of the FASN inhibitor TVB-2640 in combination with trastuzumab plus paclitaxel or endocrine therapy in patients with HER2-positive metastatic breast cancer who are resistant to trastuzumab.	The FASN inhibitor TVB-2640 may inhibit the growth of tumor cells by blocking certain enzymes required for cell growth.	NCT03179904
ACCA inhibitors	A series of novel color-filled derivatives	Department of Pharmaceutical Chemistry, China Pharmaceutical University	Design, synthesis and biological evaluation of novel chromanine derivatives as non-selective acetyl-CoA carboxylase inhibitors.	Recent studies have shown that acetyl-CoA carboxylases (ACCs) are closely related to various metabolic diseases and cancers. In this study, a series of chromogen derivatives were synthesized and their inhibitory activity against ACCs was evaluated. Compound 4S was obtained, with IC50 values of 98.06 nM for ACC1 and 29.43 nM for ACC2.	Research link for the National High Technology Research and Development Program of China (863 Program) New Drug Development Project (Project No.: 2013ZX09301303-002): https://doi.org/10.1016/j.bioorg.2020.103943
	Spirokepyrazole	Jiangsu Provincial Key Laboratory of New Drug Research and Clinical Pharmacy, Xuzhou Medical University	Synthesis and in vitro evaluation of novel spironepyrazole compounds: acetyl-CoA carboxylase inhibitors and potential antitumor drugs	Acetyl-CoA carboxylase (ACC) is the rate-limiting enzyme in de novo fatty acid synthesis and plays a crucial role in the growth and survival of cancer cells. This study synthesized a series of spironepyrazole derivatives with quinoline moieties and evaluated their in vitro anticancer activity as ACC inhibitors.
	PF-05221304	Columbia University	Effects of ACC inhibitors on lipid and lipoprotein metabolism	Acetyl-CoA carboxylase (ACC) is the rate-limiting enzyme in lipogenesis and plays an important role in the synthesis and oxidation of fatty acids.	NCT04395950
Choline kinase inhibitors	Drug: TCD-717	Translational Cancer Drugs Pharma, SL	A study of intravenous TCD-717 in patients with advanced solid tumors	TCD Pharma has developed a novel drug, TCD-717, which is an enzyme that specifically inhibits choline kinase α (ChoKα). Choline kinase α is involved in the synthesis of phosphatidylcholine, a major phospholipid component of eukaryotic cell membranes, and has been shown to be a potent oncogene when overexpressed in human cells.	NCT01215864
Aromatase inhibitors	Steroid Artificial Intelligence	The First Affiliated Hospital of China Medical University	The Effects of Aromatase Inhibitors on Blood Lipids in Postmenopausal Hormone Receptor-Positive Breast Cancer Patients in Northern China and the Prognosis of Different Lipid-Lowering Drug Treatments: A Prospective, Multicenter, Open-Label, Randomized, Parallel-Group, Controlled, Two-Phase Trial Protocol	Exemestane reduces the risk of breast cancer by blocking the effects of estrogen, which is involved in lipid metabolism. Therefore, after taking exemestane, estrogen levels in the body decrease, which may lead to dyslipidemia and lipid disorders.	ChiCTR1900024790
	Exemestane; a nonsteroidal aromatase inhibitor
	Letrozole or Anastrozole
	Letrozole	Novartis Pharmaceuticals	A study evaluating the effects of letrozole and tamoxifen on bone and blood lipids in postmenopausal women with breast cancer.	Estrogen is a regulator of bone and lipid metabolism. Letrozole is a potent inhibitor of estrogen synthesis.	NCT00171704
	Tamoxifen
	Isimmetan	Chinese Academy of Medical Sciences	The effect of aromatase inhibitors as adjuvant endocrine therapy on postoperative blood lipid levels in postmenopausal breast cancer patients	Effects of steroid aromatase inhibitors (AIs) exemestane and nonsteroidal AIs on lipid levels in breast cancer patients	NCT02765373
	Letrozole
	Anastrozole
Ketogenic diet and low-carbohydrate diet	Personalized nutrition strategies (diet + supplements)	AZTI - Member of the Basque Research and Technology Alliance	Personalized nutritional intervention for breast cancer survivors based on individual molecular analyses (nutrogenomics, lipidomics, and microbiome).	Secondary compounds and polyunsaturated fatty acids in low-animal fats can reduce immune escape and angiogenesis of tumor cells.	ISRCTN13901439
	Dietary supplements: fish oil + evening primrose oil	University of Belgrade	Application of fish oil and evening primrose oil in breast cancer treatment	Fish oil is the richest source of anti-inflammatory n-3 polyunsaturated fatty acids. Evening primrose oil (EPO) is rich in 18:3 n-6, the only n-6 fatty acid with anti-inflammatory properties. Studies have shown that dietary intake of fish oil or evening primrose oil can reduce inflammation and improve polyunsaturated fatty acid levels in cancer patients.	NCT03516253
	Behavior: Mediterranean diet	Gangnam Severance Hospital	The effects of Mediterranean diet intervention on postmenopausal breast cancer women receiving adjuvant hormone therapy: a randomized controlled trial	Adhering to a Mediterranean diet may directly or indirectly inhibit cell proliferation and induce cell cycle arrest and apoptosis.	NCT04045392
	Dietary supplements: Omega-3 fatty acid supplements	University of Michigan Rogers Cancer Center	Tolerance to treatment with omega-3 fatty acids, lipid peroxidation and aromatase inhibitors	Studies have shown that more than half of patients who experienced joint pain and stiffness after taking aromatase inhibitors saw improvement in their symptoms after taking omega-3 fatty acid supplements.	NCT04268134
Other	Lipidomics analysis of breast cancer patients	Fondazione Policlinico	Lipidome profiling of non-metastatic breast cancer surgery patients: a preliminary study	Lipomic characteristics of breast cancer patients awaiting surgery at different body mass indices	NCT06026631
		University of Agostino\Gemelli IRCCS
	ceramide	Cancer Clinical Trial Alliance	Phase II study of topical application of ceramide lipids for the treatment of cutaneous breast cancer	Chemotherapy drugs work through different mechanisms to prevent tumor cells from dividing, thereby stopping tumor growth or causing tumor cells to die.	NCT00008320
	Tamoxifen	Zhejiang Cancer Hospital	Effects of adjuvant goserelin combined with tamoxifen on breast density in premenopausal or perimenopausal early breast cancer patients	Tamoxifen is used as adjuvant hormone therapy for women with early breast cancer who are premenopausal or perimenopausal.	NCT00827307
	Gosherelin
	Letrozole	KU Leuven Ziekenhuizen University	Research on the application of atezolizumab in newly diagnosed endocrine receptor-positive breast cancer	Endocrine therapy for breast cancer using aromatase inhibitors	NCT04630210
	Atezolizumab
	Dietary supplements: mimicking fasting diets	IRCCS National Cancer Institute Foundation, Milan	Preoperative chemotherapy combined with a fasting-mimicking diet (with or without metformin) to target metabolism in triple-negative breast cancer: the BREAKFAST trial.	Preclinical studies have shown that fasting or calorie restriction, low-carbohydrate, low-protein diets (also known as fasting-mimicking diets, FMD) combined with chemotherapy drugs such as doxorubicin or cisplatin have synergistic cytotoxic effects in a variety of in vitro and in vivo tumor models, including a mouse triple-negative breast cancer model.	NCT04248998
	Metformin
	Preoperative chemotherapy
	Metformin	Oxford University Hospitals NHS Trust	A phase II single-arm study aimed to investigate the effects of metformin on cancer metabolism in early-stage breast cancer patients receiving neoadjuvant chemotherapy.	Currently, there is increasing evidence from in vitro laboratory and animal studies indicating that metformin possesses anticancer properties. Furthermore, a retrospective clinical study in diabetic patients showed that in early-stage breast cancer patients, those concurrently taking metformin to treat diabetes had significantly improved pathological response rates to preoperative chemotherapy (o…	NCT01266486
	Dasatinib dietary supplement: Eicosapentaenoic acid ethyl ester	The National Cancer Institute (NCI)	Phase Ib/II study of EPA-targeted EphA2 therapy in patients with metastatic triple-negative inflammatory breast cancer	Dasatinib belongs to the class of tyrosine kinase inhibitors. Its mechanism of action is to block the activity of an abnormal protein that signals cancer cells to proliferate, thereby inhibiting cancer cell growth. Eicosapentaenoic acid (EPA) ethyl eicosapentaenoic acid (EEPA) is an omega-3 fatty acid and belongs to the class of lipid-lowering drugs or lipid regulators.	NCT05198843
